# Supplementary material for: Enzymatic synthesis of selenium-containing amphiphilic aliphatic polycarbonate as an oxidation-responsive drug delivery vehicle
Source: Royal Society of Chemistry journal article supplement (doi:10.1039/c8ra10282a), 2019-01-01
Supplement: c8ra10282a1.pdf [file c8ra10282a1.pdf]

## Supplementary Information

### Enzymatic synthesis of aliphatic polycarbonate as oxidation-responsive drug delivery vehicle

Xian-Ling Yang, Xiu Xing, Jun Li, Yan-Hong Liu, Na Wang\* and Xiao-Qi Yu\*

Key Laboratory of Green Chemistry & Technology, Ministry of Education, College of Chemistry, Sichuan University, Chengdu 610064, P. R. China

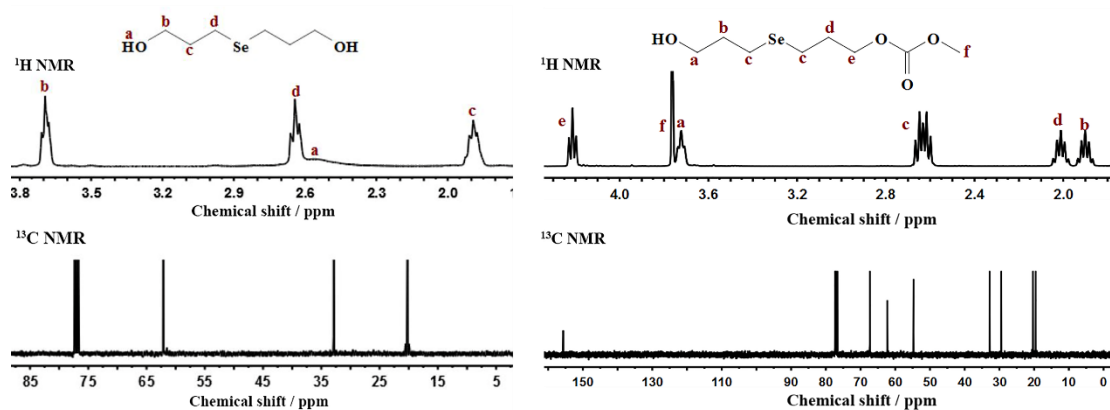

Fig. S1 NMR spectra of (a) bis(3-hydroxypropyl) selenide, (b) 3-((3-hydroxypropyl)selenyl)propyl methyl carbonate in CDCl<sub>3</sub>.

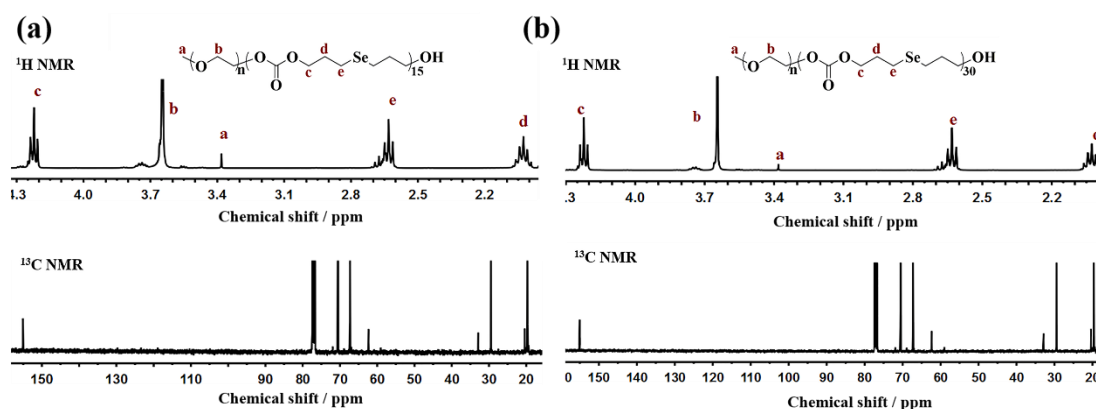

Fig. S2 NMR spectra of (a) mPEG-*b*-CMP<sub>15</sub>, (b) mPEG-*b*-CMP<sub>30</sub> in CDCl<sub>3</sub>.

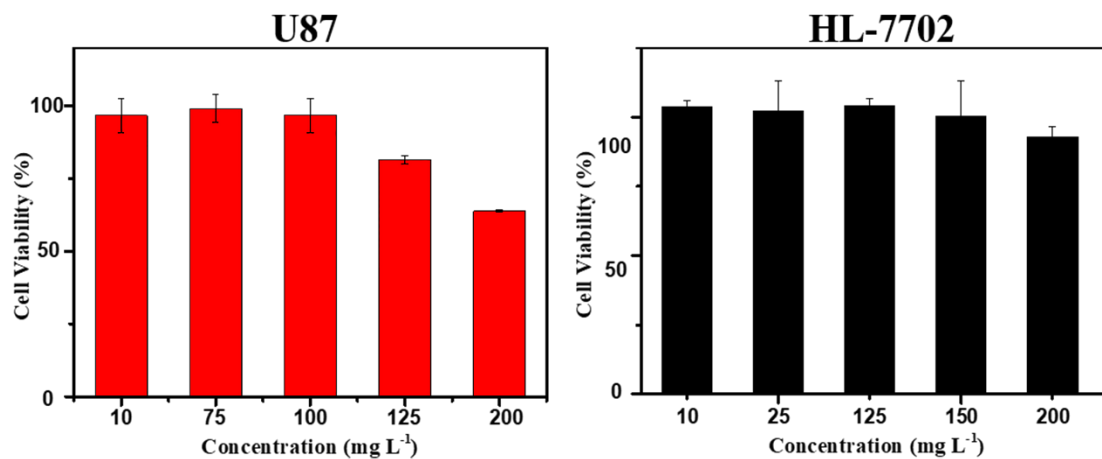

Fig. S3 MTS assay of mPEG-*b*-CMP<sub>45</sub> in U87 and HL-7702 after incubation for 24 h. The blank cells were used as control and the standard deviation for each data point was averaged over three samples (n = 3).
